# Supplementary material
Source: PubMed Central journal article supplement (PMC5546239)
Supplement: NIHMS890836-supplement-2.pdf [file NIHMS890836-supplement-2.pdf]

## SUPPLEMENTARY MATERIAL

**Supplementary Figure 1.** Loss of hepatic fatty acid oxidation does not alter body weight or adiposity during low fat feeding, related to Figure 1.

**Supplementary Figure 2.** Loss of hepatic fatty acid oxidation does not significantly alter serum TBARS or transcriptional programming of oxidative stress genes related to Figure 2.

**Supplementary Figure 3.** Loss of hepatic fatty acid oxidation did not affect bone quality related to Figure 3.

**Supplementary Figure 4.** Transcriptional programming of bile acid metabolism genes in the liver was not significantly altered in  $Cpt2^{L-/-}$  mice by HFD, related to Figure 4.

**Supplementary Figure 5.** 2-Deoxy-glucose uptake in skeletal muscle and adipose tissue is not different in  $Cpt2^{lox/lox}$  and  $Cpt2^{L-/-}$  mice under hyperinsulinemic-euglycemic clamp, related to Figure 5.

**Supplementary Figure 6.** Liver-specific loss of  $Cpt2$  did not induce browning in adipose tissue, related to Figure 6.

**Supplementary Figure 7.** Effects of feeding female  $Cpt2^{L-/-}$  mice a high fat diet at thermoneutrality, related to Figure 7.

**Supplementary Table 1.** List of PCR primers, related to Experimental Procedures.

**Supplementary Table 2.** Fatty acid composition of Liver and iWAT of  $Cpt2^{lox/lox}$  and  $Cpt2^{L-/-}$  mice fed a HFD for 16wks, related to Figure 2.

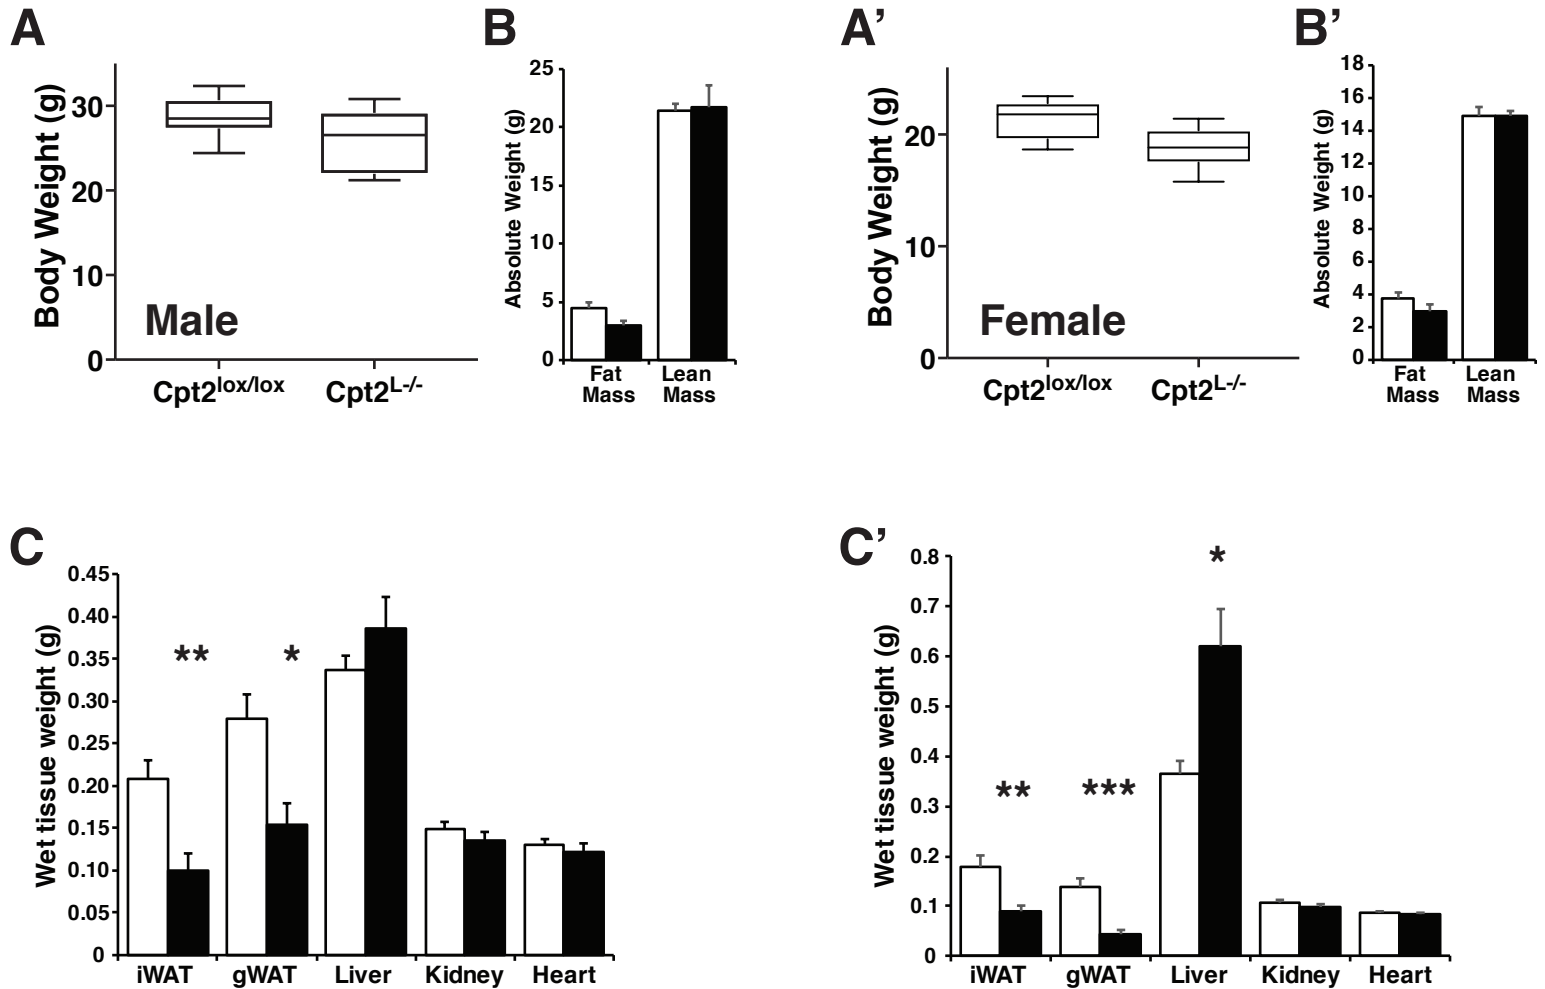

**Supplementary Figure 1. Loss of hepatic fatty acid oxidation does not alter body weight or adiposity during low fat feeding, related to Figure 1.**

- (A) Body weight of male *Cpt2*<sup>lox/lox</sup> and *Cpt2*<sup>L-/-</sup> mice fed a LFD for 16wks (n=5-10).
- (B) Body compositions of male *Cpt2*<sup>lox/lox</sup> and *Cpt2*<sup>L-/-</sup> mice fed a LFD for 16wks measured by EchoMRI (n=5-10).
- (C) Wet weights of iWAT and gWAT unilateral depots, liver and kidney for male *Cpt2*<sup>lox/lox</sup> and *Cpt2*<sup>L-/-</sup> mice fed a LFD for 16wks (n=5-10).

A', B' and C' indicate body weight, body composition and wet tissue weights, respectively, of female *Cpt2*<sup>lox/lox</sup> and *Cpt2*<sup>L-/-</sup> mice fed a LFD for 16 weeks (n=5-8).

Data are expressed as mean ± SEM. \*p<0.05; \*\*p<0.01; \*\*\*p<0.001

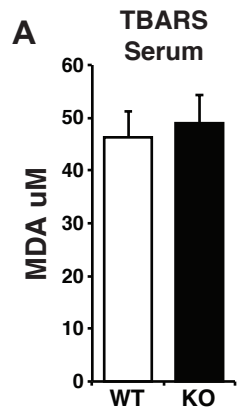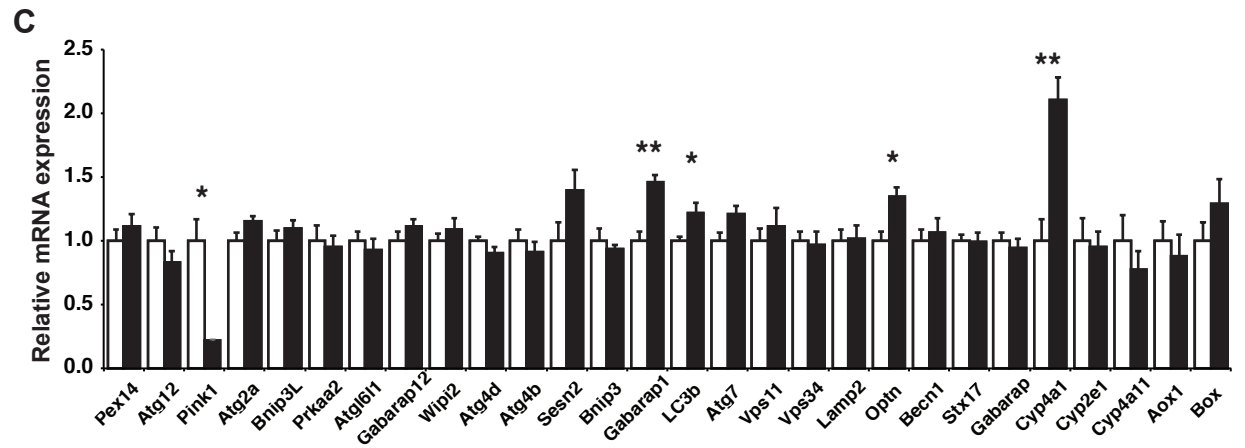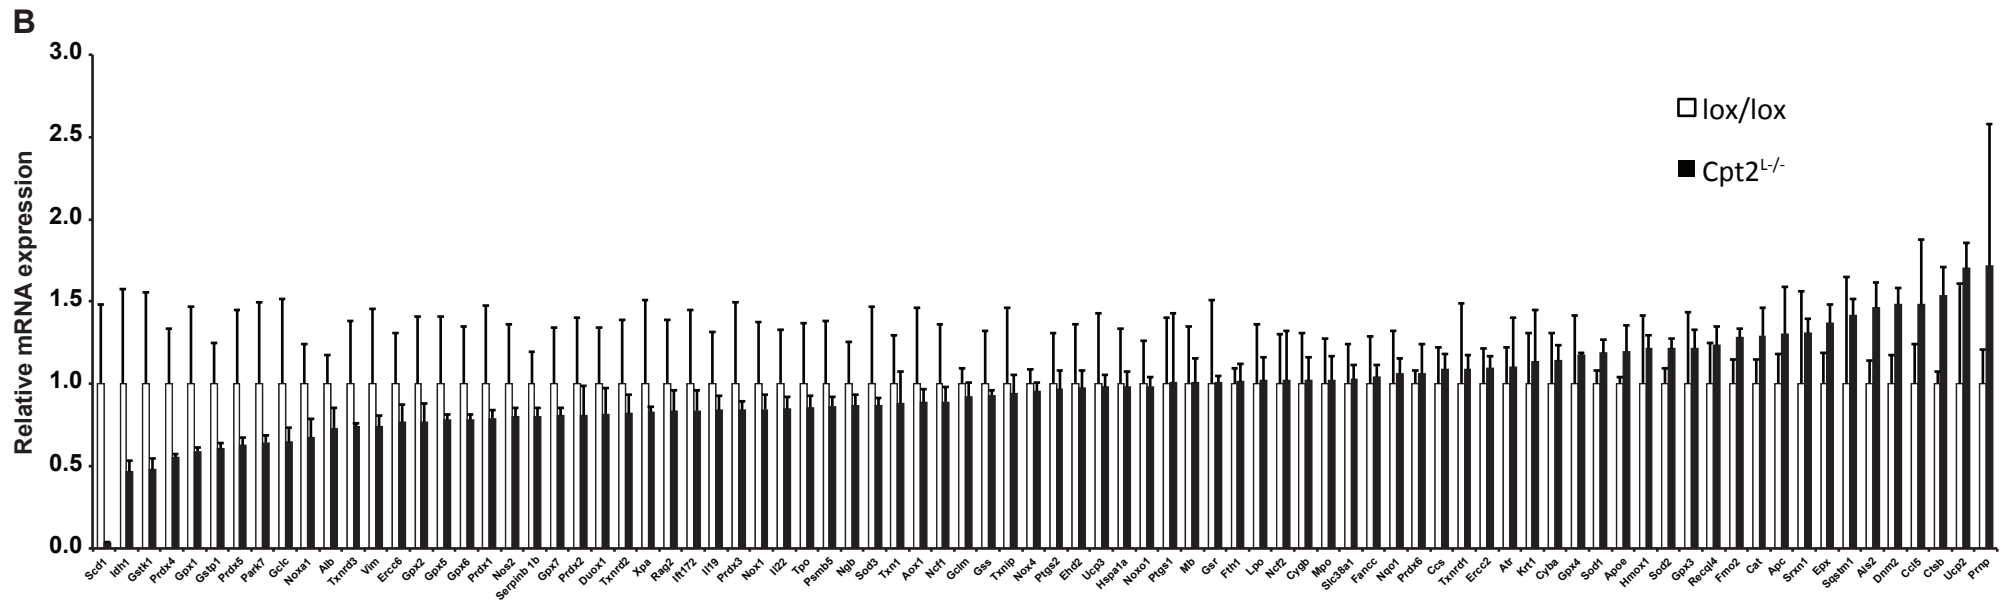

**Supplementary Figure 2. Loss of hepatic fatty acid oxidation does not significantly alter serum TBARS or transcriptional programming of oxidative stress genes, related to Figure 2.**

- (A) TBARS assay measuring lipid peroxidation in serum of male *Cpt2lox/lox* and *Cpt2L<sup>-/-</sup>* mice fed a HFD for 16wks (n=6).  
 (B) Gene expression profiling of genes involved in oxidative stress via oxistress array in livers of male *Cpt2lox/lox* and *Cpt2L<sup>-/-</sup>* mice fed a HFD for 16wks (n=3).  
 (C) Gene expression profiling of genes involved in peroxisome and autophagy genes in livers of male *Cpt2lox/lox* and *Cpt2L<sup>-/-</sup>* mice fed a HFD for 16wks (n=6).  
 Data are expressed as mean ± SEM. \*p<0.05; \*\*p<0.01; \*\*\*p<0.001

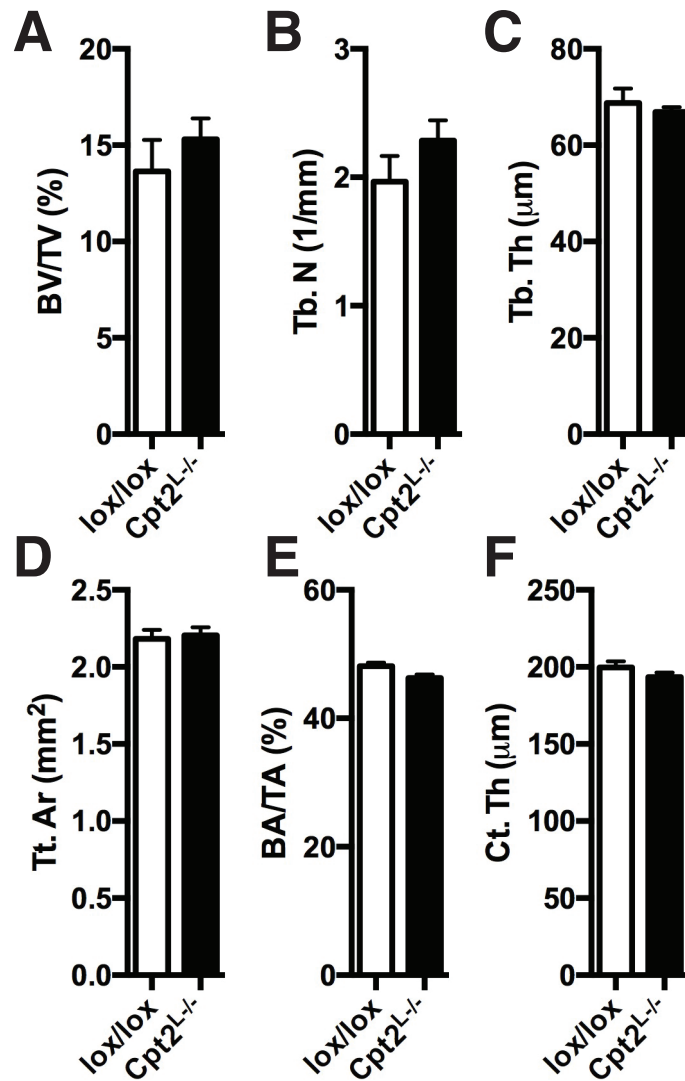

**Supplementary Figure 3. Loss of hepatic fatty acid oxidation did not affect bone structure, related to Figure 3.**

- (A) Trabecular bone volume/tissue volume (BV/TV) of *Cpt2lox/lox* and *Cpt2L<sup>-/-</sup>* mice fed a HFD for 16wks.
- (B) Trabecular number of *Cpt2lox/lox* and *Cpt2L<sup>-/-</sup>* mice fed a HFD for 16wks.
- (C) Trabecular thickness of *Cpt2lox/lox* and *Cpt2L<sup>-/-</sup>* mice fed a HFD for 16wks.
- (D) Cortical bone volume/tissue volume (BV/TV) of *Cpt2lox/lox* and *Cpt2L<sup>-/-</sup>* mice fed a HFD for 16wks.
- (E) Cortical number of *Cpt2lox/lox* and *Cpt2L<sup>-/-</sup>* mice fed a HFD for 16wks.
- (F) Cortical thickness of *Cpt2lox/lox* and *Cpt2L<sup>-/-</sup>* mice fed a HFD for 16wks.

Data are expressed as mean  $\pm$  SEM (n=8-12)

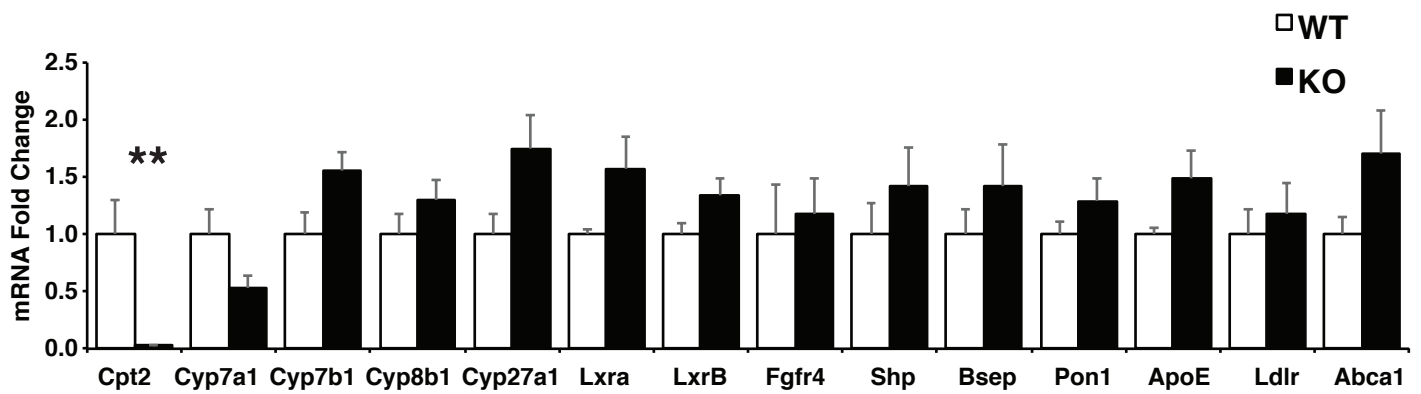

**Supplementary Figure 4. Transcriptional programming of bile acid metabolism genes in the liver was not significantly altered in *Cpt2L<sup>-/-</sup>* mice by HFD, related to Figure 4. Data are expressed as mean  $\pm$  SEM. \*\*p<0.01 (n=4).**

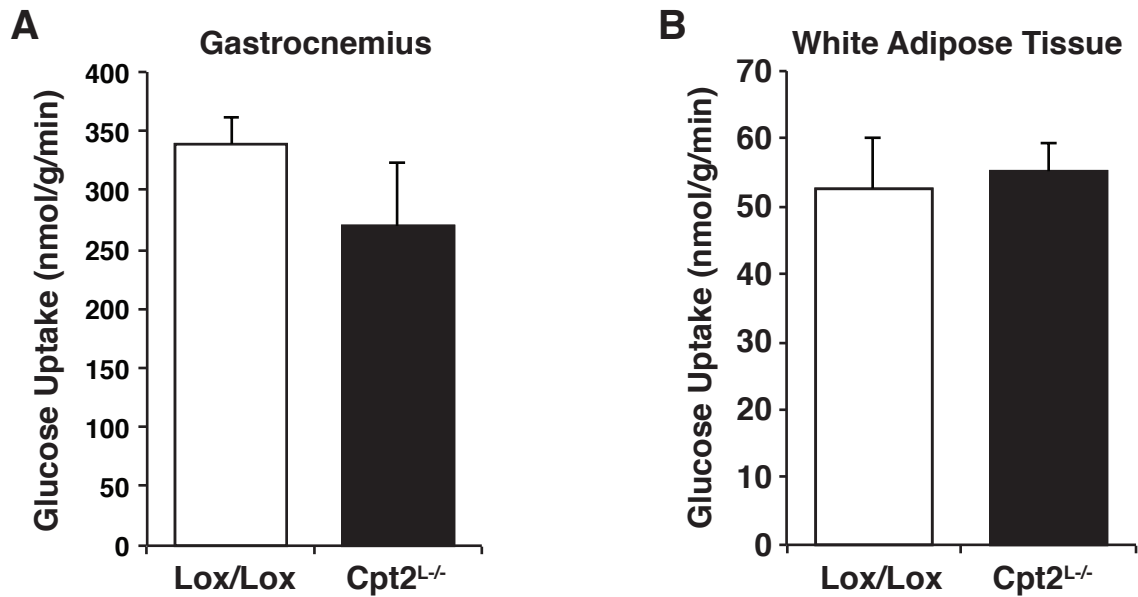

**Supplementary Figure 5. 2-Deoxy-glucose uptake in skeletal muscle and adipose tissue is not different in Cpt2lox/lox and Cpt2L<sup>-/-</sup> mice under hyperinsulinemic-euglycemic clamp, related to Figure 5.**

(A) 2-Deoxy-glucose uptake in Gastrocnemius muscle in Cpt2lox/lox and Cpt2L<sup>-/-</sup> mice (n=7-9).

(B) 2-Deoxy-glucose uptake in gWAT in Cpt2lox/lox and Cpt2L<sup>-/-</sup> mice (n=7-9).

Data are expressed as mean ± SEM.

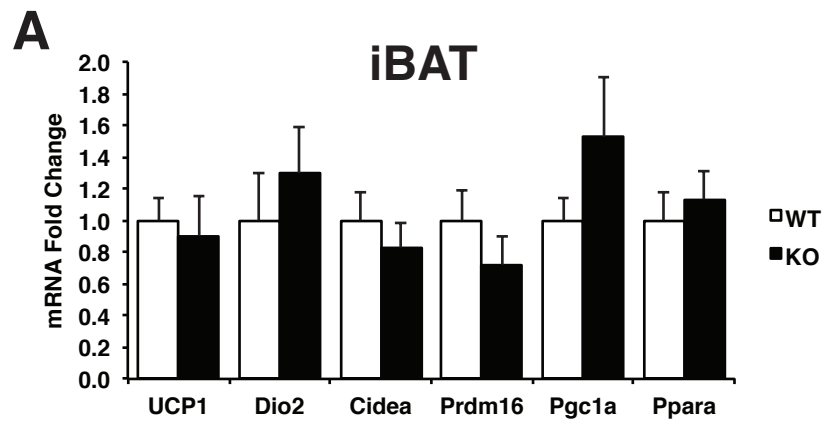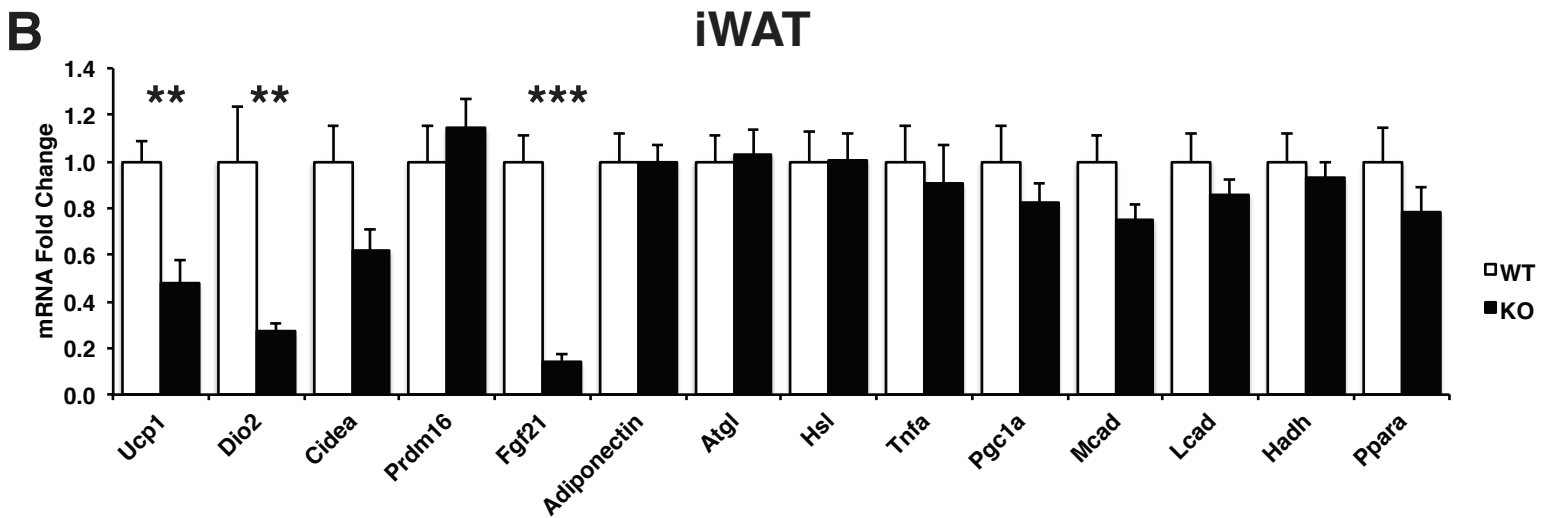

**Supplementary Figure 6. Liver-specific loss of Cpt2 did not induce browning in adipose tissue, related to Figure 6.**

(A) BAT gene expression in *Cpt2lox/lox* and *Cpt2L<sup>-/-</sup>* mice fed a HFD for 16wks (n=6).

(B) iWAT gene expression in *Cpt2lox/lox* and *Cpt2L<sup>-/-</sup>* mice fed a HFD for 16wks (n=6).

Data are expressed as mean  $\pm$  SEM. \*\*p<0.01; \*\*\*p<0.001

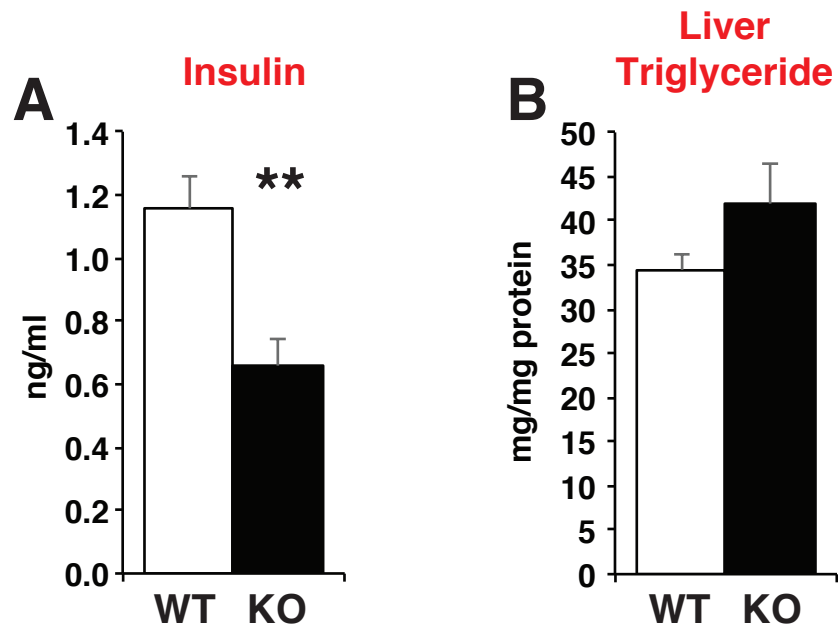

**Supplementary Figure 7. Effects of feeding female *Cpt2L*<sup>-/-</sup> mice a high fat diet at thermoneutrality, related to Figure 7.**

- (A) Serum insulin concentration of female *Cpt2lox/lox* and *Cpt2L*<sup>-/-</sup> mice fed a HFD for 16wks at 30°C (n=6).  
(B) Liver triglyceride concentration of female *Cpt2lox/lox* and *Cpt2L*<sup>-/-</sup> mice fed a HFD for 16wks at 30°C (n=6).  
Data are expressed as mean ± SEM. \*\*p<0.01



**Supplementary Table 1. List of PCR primers, related to Experimental Procedures.**

| <b>Gene</b>                   | <b>Forward</b>           | <b>Reverse</b>             |
|-------------------------------|--------------------------|----------------------------|
| <i>fgf15</i>                  | gaggacaaaacgaacgaatt     | acgtccttgatggcaatcg        |
| <i>fxr</i>                    | gcttgatgtgctacaaaagctg   | ctgtggtgatggttgaatgcc      |
| <i>ost<math>\alpha</math></i> | atgcaictgggtgaacagaa     | gagtagggaggtgagcaagc       |
| <i>ostb</i>                   | gaccacagtgcagagaaagc     | cttgtcatgaccaccaggac       |
| <i>ibabp</i>                  | caaggctaccgtgaagatgga    | cccacgacctccgaagtct        |
| <i>diet1</i>                  | actgttcggttctggttctac    | ctccagatgcacacgttggg       |
| <i>cyp4a1</i>                 | ctcattcctgccccttctcag    | tcccattttggacttcagc        |
| <i>cyp2e1</i>                 | atgtctgcccctggagtgga     | gatgtccttccaggtaggtcc      |
| <i>cyp4a11</i>                | aggagctccaacaggaccag     | cctgatggctgaaggcacac       |
| <i>Aox1</i>                   | agctccgatcagccagacat     | ttctfgaacagagcccagaatg     |
| <i>box</i>                    | gggcattccacatccgggtg     | tggctcctgagcagatcagc       |
| <i>pex14</i>                  | aggactgacagacgaagagatt   | tgatgatagccaaggccacata     |
| <i>atg12</i>                  | ggcctcggaaacagttgttta    | cagcaccgaaatgtctctga       |
| <i>pink1</i>                  | ttcttccgccagtcggtag      | ctgtcttctctgatcagcc        |
| <i>atg2a</i>                  | ccacctctgcaaatcggca      | ccagttgtcctgatacctcca      |
| <i>bnip3l</i>                 | atgtctcactatgctgagccg    | ctcatgctgtcattccagga       |
| <i>prkaa2</i>                 | caggccataaagtggcagtta    | aaaagtctgtcggagtgctga      |
| <i>atg16l1</i>                | cgaaatctggactgtggatga    | agcaggaacttggcagagag       |
| <i>gabarapl2</i>              | tcgggcttcagatgtttgac     | atggccttctcggagggaa        |
| <i>wipi2</i>                  | aggataacacgtccctagctg    | tcctccacaatgcagacatct      |
| <i>atg4d</i>                  | gtcaagtatggttggcagtt     | tgtacccttccctcgaat         |
| <i>atg4b</i>                  | catccatcagatagcgcgaaa    | tgatttctctcatcaccaca       |
| <i>sesn2</i>                  | tccgagtccattccgagat      | tccgggtgtagaccatcac        |
| <i>bnip3</i>                  | tcctgggtagaactgcacttc    | gctggcatccaacagattt        |
| <i>gabarapl1</i>              | ggaccacccttcgagatc       | cctctatccagatcagggacc      |
| <i>lc3b</i>                   | cccaccaagatcccagtgat     | ccaggaaacttggcttctcca      |
| <i>atg7</i>                   | tgcctatgatgatctgtgfc     | caccaactgttatctttgtcc      |
| <i>vps11</i>                  | aaaagagagacgggtggcaatc   | agcccagtaacgggatagttg      |
| <i>vps34</i>                  | cctggacatcaacgtgcag      | tgtctcttggatagcccagaaa     |
| <i>lamp2</i>                  | gatgtgcctctctccggfta     | attggactgaacggctccta       |
| <i>optn</i>                   | atgtcccataacctctgagc     | tcaaatgcccttcatagcttg      |
| <i>becn1</i>                  | ggaaaagaaccgcaaggtggfg   | aaactgtccgtgtgccagatg      |
| <i>stx17</i>                  | tcaaagtggcagggaattgcag   | aattttccacctgtgaagcctaa    |
| <i>gabarap</i>                | aagaggagcatccgttcgaga    | gctttggggctttttccac        |
| <i>Acs1</i>                   | atctgtgggaacgagcgaag     | tcctttggggttcctgtag        |
| <i>Pgc1a</i>                  | caacatgctcaagccaaaccaaca | cgctcaatagtctgttctcaaatggg |
| <i>Acot1</i>                  | gacaagaagagcttcattcccgtg | catcagcatagaactcgtcttcc    |
| <i>Acot2</i>                  | agtcaacgacgcaaaatggtg    | gctcttcaatcctgttggc        |
| <i>Acox1</i>                  | acgccacttcttctcttc       | agattggtgaaaatgctgcaaa     |
| <i>Cpt1a</i>                  | ccatctgtcctgacaaggtttag  | cctcacttctgtacagctagcac    |
| <i>Mcad</i>                   | aacacttactatgctcgtattgca | ccatagcctccgaaaatctgaa     |
| <i>Lcad</i>                   | tttctcggagcatgacatttt    | ggcagcttttccagacct         |
| <i>Hadha</i>                  | tgcatttcccgcagctttac     | gttggcccagatttcgtca        |
| <i>Ppara</i>                  | gggtacggcaatggctttat     | gaacggcttctcagggtctt       |
| <i>Pdk4</i>                   | atctaacatcgccagaattaaacc | ggaacgtacacaatgtggattg     |
| <i>Gpnmb</i>                  | cattcccactctgaaggtgaaa   | aaatggcagagtcgttgaggga     |
| <i>Phospho1</i>               | aagcacatcatccacagtcctc   | ttggtctccagctgtcatccag     |
| <i>Fabp3</i>                  | acctggaagctagtggacag     | tgatgtagttaggcttggcat      |
| <i>Atf3</i>                   | cgaagactggagcaaaatgat    | caggttagcaaaatcctcaaac     |
| <i>Plin3</i>                  | tccaagctggacttggtagg     | gcgcatctgtaccattgct        |
| <i>Jun</i>                    | ccttctacgacgatccctc      | ggttcaaggtcatgctctgttt     |
| <i>Agpat9</i>                 | ggccttcggattatccctgg     | cttggggctccttctgaa         |
| <i>Pex11a</i>                 | gacgccttcatccgagtcg      | cggcctcttctcagctttaga      |
| <i>Ehhadh</i>                 | cagatgaagcactcaagcttg    | accttggcaatggcttctgca      |
| <i>Myc</i>                    | atgcccctcaacgtgaacttg    | cgcaacataggatggagagca      |

Supplementary Table 2. Fatty acid composition of Liver and iWAT of Cpt2lox/lox and Cpt2L-/- mice fed a HFD for 16wks, related to Figure 2.

|                                 | LIVER ug/mg tissue |       |           |       | LIVER % |         |          |           | ADIPOSE ug/mg tissue |       |         |            | ADIPOSE % |            |       |         |           |           |           |       |
|---------------------------------|--------------------|-------|-----------|-------|---------|---------|----------|-----------|----------------------|-------|---------|------------|-----------|------------|-------|---------|-----------|-----------|-----------|-------|
|                                 | LOX/LOX            | SE    | Cpt2 A-/- | SE    | ttest   | LOX/LOX | SE       | Cpt2 A-/- | SE                   | ttest | LOX/LOX | SE         | Cpt2 A-/- | SE         | ttest | LOX/LOX | SE        | Cpt2 A-/- | SE        | ttest |
| C10:0 - Capric                  | 0.04               | 0.02  | 0.19      | 0.02  | 0.000   | 0.00%   | 0.00156% | 0.01%     | 0.00064%             | 0.001 | 0.006   | 0.00706377 | 0.07      | 0.0138287  | 0.551 | 0.01%   | 0.000348% | 0.01%     | 0.001273% | 0.115 |
| C12:0 - Lauric                  | 0.22               | 0.12  | 1.13      | 0.11  | 0.000   | 0.02%   | 0.00937% | 0.07%     | 0.00399%             | 0.001 | 0.34    | 0.04726923 | 0.46      | 0.08712445 | 0.224 | 0.04%   | 0.001450% | 0.07%     | 0.005894% | 0.001 |
| C14:0 - Myristic                | 6.93               | 1.58  | 19.28     | 1.33  | 0.000   | 0.61%   | 0.11349% | 1.22%     | 0.02381%             | 0.001 | 5.43    | 0.75667368 | 6.86      | 1.28265766 | 0.343 | 0.71%   | 0.015598% | 1.02%     | 0.076703% | 0.002 |
| C15:0 - Pentadecanoic           | 1.31               | 0.25  | 3.59      | 0.27  | 0.000   | 0.12%   | 0.01780% | 0.23%     | 0.00608%             | 0.000 | 0.72    | 0.1076194  | 0.76      | 0.12799941 | 0.809 | 0.09%   | 0.002555% | 0.11%     | 0.005950% | 0.020 |
| C16:0 - Palmitic                | 264.84             | 11.30 | 329.22    | 11.69 | 0.003   | 24.22%  | 0.69111% | 21.04%    | 0.57787%             | 0.007 | 148.79  | 18.2648431 | 124.75    | 17.5636436 | 0.373 | 19.61%  | 0.308535% | 18.87%    | 0.599516% | 0.345 |
| C17:0 - Heptadecanoic           | 2.72               | 0.25  | 5.44      | 0.57  | 0.001   | 0.25%   | 0.01253% | 0.34%     | 0.02072%             | 0.002 | 2.85    | 0.64300314 | 1.75      | 0.37411783 | 0.194 | 0.36%   | 0.037552% | 0.26%     | 0.022852% | 0.000 |
| C18:0 - Stearic                 | 53.79              | 2.84  | 79.40     | 3.64  | 0.000   | 4.92%   | 0.18758% | 5.06%     | 0.10182%             | 0.544 | 43.53   | 6.12948929 | 27.37     | 4.37418293 | 0.069 | 5.68%   | 0.197134% | 4.11%     | 0.156936% | 0.091 |
| C20:0 - Arachidic               | 2.76               | 0.48  | 0.69      | 0.08  | 0.004   | 0.26%   | 0.04739% | 0.04%     | 0.00373%             | 0.003 | 0.66    | 0.11122890 | 0.41      | 0.07850584 | 0.111 | 0.09%   | 0.004051% | 0.06%     | 0.004789% | 0.015 |
| C22:0 - Behenic                 | 1.44               | 0.24  | 0.61      | 0.02  | 0.012   | 0.14%   | 0.02710% | 0.04%     | 0.00234%             | 0.010 | 0.17    | 0.01548838 | 0.14      | 0.02454148 | 0.290 | 0.02%   | 0.000887% | 0.02%     | 0.001576% | 0.296 |
| C23:0 - Tricosanoic             | 0.21               | 0.01  | 0.34      | 0.01  | 0.000   | 0.02%   | 0.00159% | 0.02%     | 0.00114%             | 0.321 | 0.05    | 0.00481086 | 0.05      | 0.00812591 | 0.951 | 0.01%   | 0.000378% | 0.01%     | 0.000566% | 0.338 |
| C24:0 - Lignoceric              | 0.42               | 0.03  | 0.50      | 0.01  | 0.043   | 0.04%   | 0.00426% | 0.03%     | 0.00120%             | 0.178 | 0.12    | 0.01328557 | 0.10      | 0.02532926 | 0.559 | 0.02%   | 0.001311% | 0.02%     | 0.002085% | 0.686 |
| C25:0 - Pentacosanoic           | 0.01               | 0.00  | 0.02      | 0.00  | 0.000   | 0.00%   | 0.00005% | 0.00%     | 0.00004%             | 0.001 | 0.01    | 0.00075026 | 0.01      | 0.00100028 | 0.226 | 0.00%   | 0.000031% | 0.00%     | 0.000080% | 0.179 |
| C26:0 - Hexacosanoic            | 0.01               | 0.00  | 0.01      | 0.00  | 0.022   | 0.00%   | 0.00005% | 0.00%     | 0.00002%             | 0.049 | 0.01    | 0.00107886 | 0.01      | 0.00110238 | 0.199 | 0.00%   | 0.000025% | 0.00%     | 0.000071% | 0.105 |
| C28:0 - Octacosanoic            | 0.00               | 0.00  | 0.00      | 0.00  | 0.306   | 0.00%   | 0.00002% | 0.00%     | 0.00002%             | 0.602 | 0.00    | 0.00025447 | 0.00      | 0.00013062 | 0.149 | 0.00%   | 0.000020% | 0.00%     | 0.000021% | 0.249 |
| C30:0                           | 0.00               | 0.00  | 0.00      | 0.00  | 0.333   | 0.00%   | 0.00003% | 0.00%     | 0.00002%             | 0.700 | 0.00    | 0.00039531 | 0.00      | 0.00022175 | 0.520 | 0.00%   | 0.000034% | 0.00%     | 0.000021% | 0.822 |
| C10:1 - Caproic                 | 0.02               | 0.01  | 0.10      | 0.01  | 0.001   | 0.00%   | 0.00105% | 0.01%     | 0.00043%             | 0.002 | 0.00    | 0.00063755 | 0.01      | 0.00119983 | 0.313 | 0.00%   | 0.000047% | 0.00%     | 0.000084% | 0.032 |
| C12:1 - Dodecaenoic             | 0.00               | 0.00  | 0.00      | 0.00  | 0.010   | 0.00%   | 0.00002% | 0.00%     | 0.00003%             | 0.025 | 0.00    | 0.00053283 | 0.01      | 0.00269868 | 0.010 | 0.00%   | 0.000038% | 0.00%     | 0.000286% | 0.001 |
| C16:1(n-9)                      | 33.46              | 4.94  | 73.91     | 5.45  | 0.000   | 2.99%   | 0.31445% | 4.68%     | 0.16069%             | 0.001 | 9.79    | 1.86703136 | 8.20      | 1.47194833 | 0.533 | 1.24%   | 0.088427% | 1.22%     | 0.087244% | 0.868 |
| C17:1 - Heptadecanoic           | 2.80               | 0.27  | 4.74      | 0.38  | 0.002   | 0.25%   | 0.01278% | 0.30%     | 0.00922%             | 0.019 | 1.86    | 0.45630072 | 2.20      | 0.31572185 | 0.566 | 0.23%   | 0.049353% | 0.33%     | 0.01491%  | 0.078 |
| C18:1(n-9) - Oleic              | 310.16             | 15.70 | 408.56    | 15.28 | 0.002   | 28.29%  | 0.75215% | 26.09%    | 0.63451%             | 0.057 | 284.32  | 25.540771  | 240.22    | 21.4074887 | 0.230 | 38.39%  | 0.562447% | 37.42%    | 1.546898% | 0.676 |
| C20:1(n-9) - Eicosenoic         | 9.48               | 1.56  | 3.80      | 0.41  | 0.010   | 0.87%   | 0.13629% | 0.24%     | 0.01526%             | 0.002 | 6.21    | 1.0495953  | 4.46      | 0.76459089 | 0.226 | 0.80%   | 0.032586% | 0.67%     | 0.037482% | 0.110 |
| C20:3(n-9) - Mead               | 1.34               | 0.13  | 1.12      | 0.15  | 0.288   | 0.12%   | 0.01184% | 0.07%     | 0.00678%             | 0.005 | 0.20    | 0.02650522 | 0.16      | 0.03130611 | 0.325 | 0.03%   | 0.000598% | 0.02%     | 0.001884% | 0.155 |
| C22:1(n-9) - Erucic             | 0.65               | 0.12  | 0.14      | 0.01  | 0.003   | 0.06%   | 0.01074% | 0.01%     | 0.00043%             | 0.002 | 0.21    | 0.03740123 | 0.14      | 0.02728316 | 0.176 | 0.03%   | 0.001133% | 0.02%     | 0.001657% | 0.074 |
| C24:1(n-9) - Nervonic           | 0.72               | 0.05  | 0.78      | 0.04  | 0.362   | 0.07%   | 0.00644% | 0.05%     | 0.00176%             | 0.042 | 0.16    | 0.01666018 | 0.15      | 0.03080184 | 0.770 | 0.02%   | 0.001346% | 0.02%     | 0.002417% | 0.846 |
| C26:1(n-9) - Nervonic           | 0.00               | 0.00  | 0.01      | 0.00  | 0.000   | 0.00%   | 0.00002% | 0.00%     | 0.00016%             | 0.001 | 0.01    | 0.00118466 | 0.01      | 0.00098035 | 0.330 | 0.00%   | 0.000072% | 0.00%     | 0.000072% | 0.314 |
| C14:1 - Myristoleic             | 0.09               | 0.00  | 0.27      | 0.04  | 0.003   | 0.01%   | 0.00189% | 0.02%     | 0.00166%             | 0.007 | 0.13    | 0.0184071  | 0.43      | 0.09597507 | 0.007 | 0.02%   | 0.000769% | 0.06%     | 0.000952% | 0.000 |
| C16:1(n-7) - Palmitoleic        | 30.54              | 5.18  | 69.22     | 7.16  | 0.002   | 2.72%   | 0.34599% | 4.36%     | 0.23860%             | 0.005 | 24.80   | 3.89312471 | 36.06     | 5.69897638 | 0.128 | 3.20%   | 0.127407% | 5.42%     | 0.370022% | 0.000 |
| C18:1(n-7) - Vaccenic           | 24.99              | 2.61  | 26.43     | 2.43  | 0.701   | 2.27%   | 0.19631% | 1.67%     | 0.07538%             | 0.026 | 21.85   | 3.49138473 | 16.56     | 2.61152013 | 0.272 | 2.81%   | 0.101260% | 2.48%     | 0.106578% | 0.099 |
| C18:1(n-5)                      | 0.31               | 0.06  | 0.22      | 0.04  | 0.248   | 0.03%   | 0.00494% | 0.01%     | 0.00229%             | 0.037 | 0.07    | 0.00642565 | 0.10      | 0.02422916 | 0.317 | 0.01%   | 0.000324% | 0.01%     | 0.002796% | 0.139 |
| C20:3(n-7)                      | 0.31               | 0.03  | 0.54      | 0.07  | 0.014   | 0.03%   | 0.00162% | 0.03%     | 0.00349%             | 0.186 | 0.06    | 0.00787352 | 0.10      | 0.01921108 | 0.089 | 0.01%   | 0.000278% | 0.01%     | 0.001467% | 0.001 |
| C14:2 - Myristoleic             | 0.10               | 0.09  | 0.70      | 0.09  | 0.001   | 0.01%   | 0.00696% | 0.04%     | 0.00371%             | 0.002 | 0.01    | 0.00138113 | 0.03      | 0.00693986 | 0.008 | 0.00%   | 0.000059% | 0.01%     | 0.000530% | 0.000 |
| C16:2 - Palmitoleic             | 1.45               | 0.71  | 6.53      | 0.61  | 0.000   | 0.12%   | 0.05508% | 0.41%     | 0.02049%             | 0.001 | 0.64    | 0.11041326 | 0.67      | 0.1217345  | 0.845 | 0.08%   | 0.003801% | 0.10%     | 0.006647% | 0.057 |
| C18:2(n-6) - Linoleic           | 210.79             | 10.67 | 310.70    | 17.91 | 0.001   | 19.23%  | 0.34950% | 19.73%    | 0.11901%             | 0.237 | 179.61  | 23.1676577 | 154.42    | 19.987566  | 0.442 | 23.57%  | 0.162580% | 23.52%    | 0.401715% | 0.938 |
| C18:2(n-6) - Conj - Rumenic     | 0.44               | 0.05  | 0.71      | 0.08  | 0.016   | 0.04%   | 0.00276% | 0.04%     | 0.00380%             | 0.310 | 0.54    | 0.08622022 | 0.51      | 0.0826964  | 0.836 | 0.07%   | 0.003464% | 0.08%     | 0.004396% | 0.307 |
| C18:2(n-6) - Gamma Linolenic    | 12.14              | 7.22  | 63.56     | 7.92  | 0.001   | 1.03%   | 0.56788% | 3.98%     | 0.37048%             | 0.003 | 0.40    | 0.06302432 | 1.85      | 0.41464224 | 0.004 | 0.05%   | 0.000797% | 0.28%     | 0.036756% | 0.000 |
| C20:2(n-6) - Eicosadienoic      | 4.74               | 0.32  | 4.61      | 0.48  | 0.824   | 0.43%   | 0.02739% | 0.29%     | 0.01799%             | 0.002 | 3.68    | 0.5436545  | 4.25      | 0.90325473 | 0.586 | 0.48%   | 0.009387% | 0.63%     | 0.059936% | 0.031 |
| C20:3(n-6) - Dihomo-g-linolenic | 12.67              | 1.56  | 5.39      | 0.76  | 0.003   | 1.18%   | 0.15809% | 0.34%     | 0.04304%             | 0.001 | 1.39    | 0.21738761 | 1.28      | 0.30718301 | 0.769 | 0.18%   | 0.009217% | 0.19%     | 0.021815% | 0.775 |
| C20:4(n-6) - Arachidonic        | 45.37              | 2.05  | 54.96     | 4.34  | 0.063   | 4.20%   | 0.32560% | 3.48%     | 0.13851%             | 0.092 | 2.28    | 0.23234222 | 3.72      | 0.77189244 | 0.083 | 0.31%   | 0.017444% | 0.55%     | 0.057306% | 0.002 |
| C22:2(n-6) - Docosadienoic      | 0.15               | 0.02  | 0.05      | 0.00  | 0.003   | 0.01%   | 0.00217% | 0.00%     | 0.00009%             | 0.002 | 0.06    | 0.00928523 | 0.05      | 0.00943337 | 0.464 | 0.01%   | 0.000268% | 0.01%     | 0.000592% | 0.648 |
| C22:4(n-6) - Adrenic            | 4.76               | 0.49  | 3.89      | 0.55  | 0.265   | 0.44%   | 0.05369% | 0.24%     | 0.02439%             | 0.012 | 0.43    | 0.05167565 | 0.51      | 0.12938186 | 0.580 | 0.06%   | 0.003318% | 0.07%     | 0.009819% | 0.115 |
| C22:5(n-6) - Docosapentaenoic   | 1.61               | 0.19  | 1.62      | 0.26  | 0.982   | 0.15%   | 0.02051% | 0.10%     | 0.01236%             | 0.088 | 0.09    | 0.0133967  | 0.08      | 0.02686837 | 0.802 | 0.01%   | 0.001291% | 0.01%     | 0.002312% | 0.925 |
| C24:2                           | 0.07               | 0.00  | 0.11      | 0.01  | 0.000   | 0.01%   | 0.00034% | 0.01%     | 0.00035%             | 0.466 | 0.04    | 0.00355734 | 0.04      | 0.00795877 | 0.911 | 0.01%   | 0.000333% | 0.01%     | 0.000602% | 0.673 |
| C26:2 - Hexacosadienoic         | 0.00               | 0.00  | 0.00      | 0.00  | 0.036   | 0.00%   | 0.00002% | 0.00%     | 0.00002%             | 0.435 | 0.00    | 0.00023046 | 0.00      | 0.0003644  | 0.297 | 0.00%   | 0.000014% | 0.00%     | 0.000035% | 0.380 |
| C18:3(n-3) - Alpha Linolenic    | 8.45               | 0.92  | 14.99     | 1.79  | 0.008   | 0.77%   | 0.06771% | 0.94%     | 0.06938%             | 0.112 | 6.67    | 0.99776972 | 8.59      | 1.74228803 | 0.342 | 0.86%   | 0.025188% | 1.28%     | 0.126519% | 0.011 |
| C20:5(n-3) - Eicosapentaenoic   | 2.90               | 0.76  | 7.75      | 0.77  | 0.002   | 0.26%   | 0.05955% | 0.49%     | 0.02570%             | 0.010 | 0.06    | 0.00861177 | 0.18      | 0.03898125 | 0.010 | 0.01%   | 0.000238% | 0.03%     | 0.003362% | 0.000 |
| C22:5(n-3)                      | 7.57               | 2.25  | 21.05     | 2.20  | 0.002   | 0.67%   | 0.16872% | 1.32%     | 0.08422%             | 0.010 | 0.27    | 0.03530219 | 0.72      | 0.1872254  | 0.030 | 0.04%   | 0.001214% | 0.11%     | 0.015089% | 0.001 |
| C22:6(n-3) - Docosahexanoic     | 26.72              | 2.13  | 26.79     | 1.72  | 0.981   | 2.48%   | 0.25782% | 1.71%     | 0.07685%             | 0.027 | 0.54    | 0.06305747 | 0.62      | 0.18201812 | 0.667 | 0.07%   | 0.003434% | 0.09%     | 0.014872% | 0.266 |
| Pristanic                       | 0.00               | 0.00  | 0.00      | 0.00  | 0.117   | 0.00%   | 0.00004% | 0.00%     | 0.00001%             | 0.762 | 0.00    | 0.00015069 | 0.00      | 0.00010318 | 0.623 | 0.00%   | 0.000020% | 0.00%     | 0.000040% | 0.344 |
| Phytanic                        | 0.00               | 0.00  | 0.01      | 0.00  | 0.010   | 0.00%   | 0.00003% | 0.00%     | 0.00003%             | 0.462 | 0.00    | 0.00024315 | 0.00      | 0.0004435  | 0.052 | 0.00%   | 0.000024% | 0.00%     | 0.000041% | 0.002 |
| C16:1 trans                     | 1.42               | 0.45  | 4.66      | 0.44  | 0.001   | 0.12%   | 0.03400% | 0.29%     | 0.01474%             | 0.002 | 0.57    | 0.09549802 | 0.51      | 0.0958322  | 0.659 | 0.07%   | 0.002725% | 0.08%     | 0.008249% | 0.814 |
| C18:1 trans                     | 3.22               | 0.39  | 6.19      | 0.61  | 0.002   | 0.29%   | 0.02268% | 0.39%     | 0.02168%             | 0.012 | 4.09    | 0.63468114 | 3.50      | 0.53375793 | 0.504 | 0.53%   | 0.015799% | 0.53%     | 0.015999% | 0.974 |
| C18:2 trans                     | 2.71               | 0.98  | 8.44      | 1.00  | 0.003   | 0.24%   | 0.07515% | 0.53%     | 0.04839%             | 0.013 | 1.46    | 0.23608368 | 1.23      | 0.20037808 | 0.481 | 0.19%   | 0.007194% | 0.18%     | 0.013077% | 0.798 |
| total saturated FA              |                    |       |           |       |         |         |          |           |                      |       |         |            |           |            |       |         |           |           |           |       |
